# Supplementary material for: Acoustic wave propagation in rivers: an experimental study
Source: Copernicus journal article supplement (doi:10.5194/esurf-7-537-2019), 2019-06-12
Supplement: Supplementary file 1 [file esurf-7-537-2019-supplement.pdf]

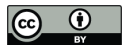

## *Supplement of*

# **Acoustic wave propagation in rivers: an experimental study**

**Thomas Geay et al.**

*Correspondence to:* Thomas Geay (th.geay@gmail.com)

The copyright of individual parts of the supplement might differ from the CC BY 4.0 License.

# Arve River

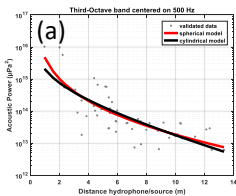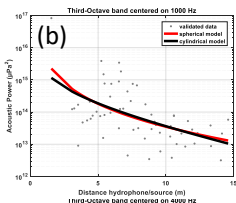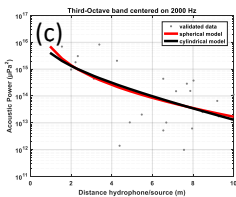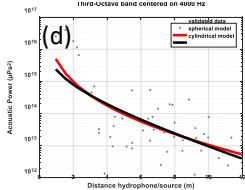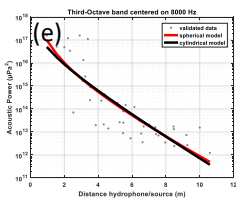

(f)

No Data at  
16000Hz

(g)

No Data at  
32000Hz

# Grand-Buëch River

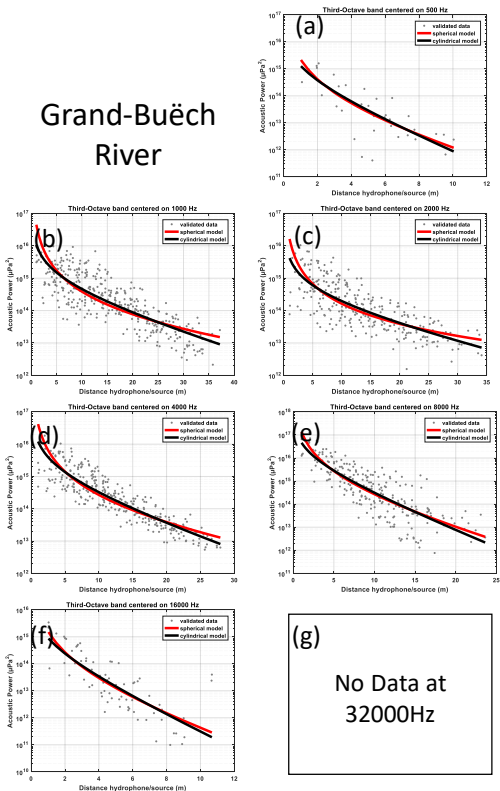

# Isère River

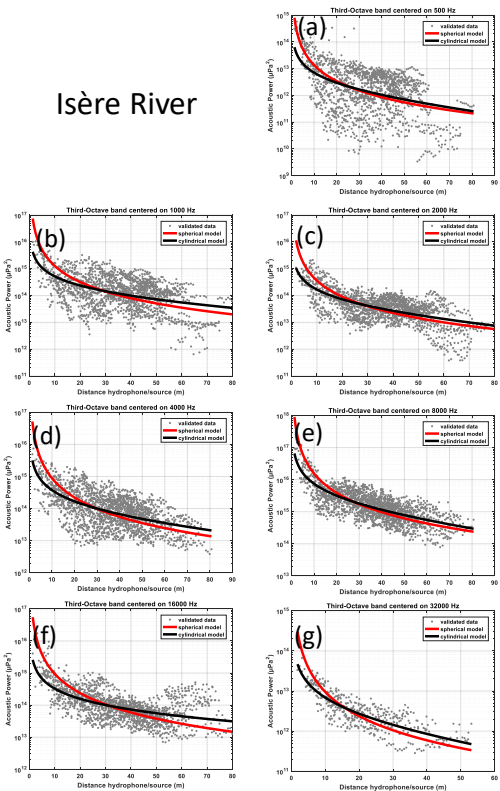

# Leysse River

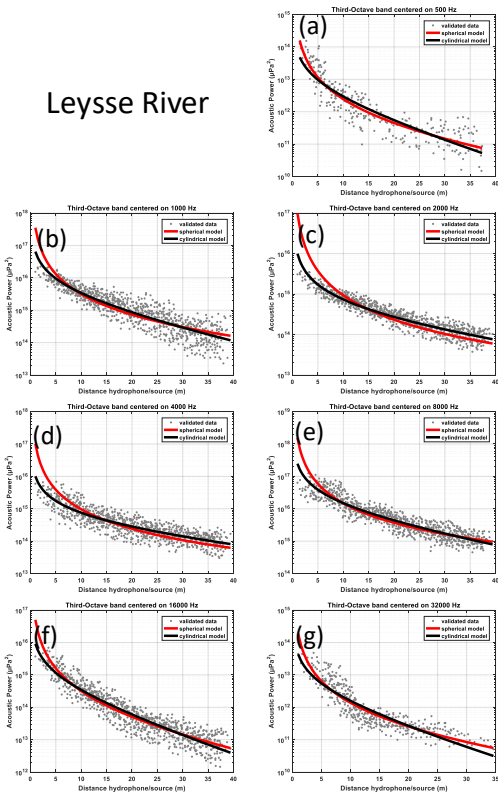

# Romanche River

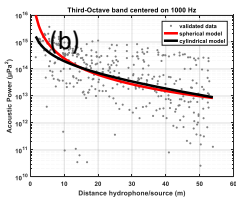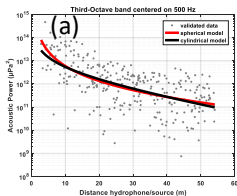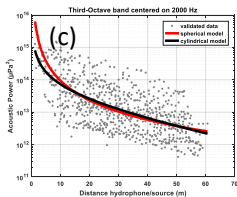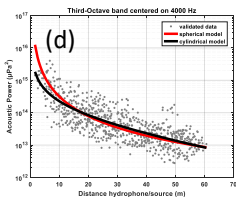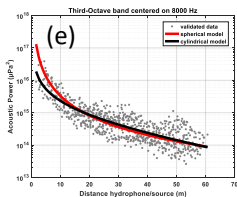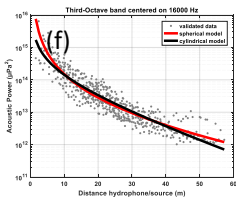

(g)

No Data at  
32000Hz

# Sarenne River

(a)

No Data at  
500Hz

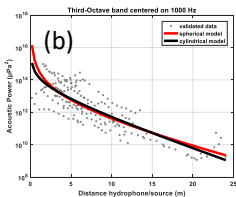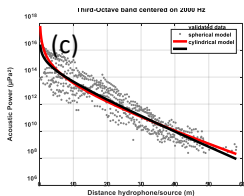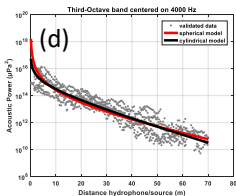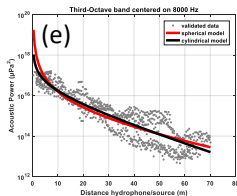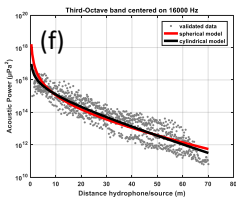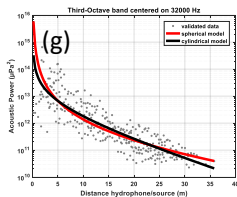

# Séveraisse River

No Data at  
500Hz

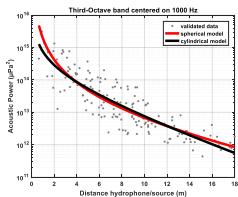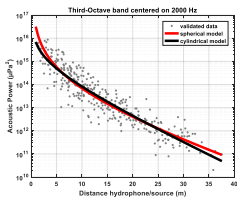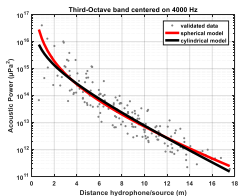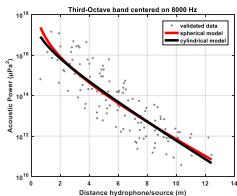

No Data at  
16000Hz

No Data at  
32000Hz
